# Supplementary material for: The association of the serum levels of myostatin, follistatin, and interleukin-6 with sarcopenia, and their impacts on survival in patients with hepatocellular carcinoma
Source: PubMed Central journal article supplement — Clin Mol Hepatol. 2020 Jul 10;26(4):492–505. doi: 10.3350/cmh.2020.0005 (PMC7641544; doi:10.3350/cmh.2020.0005), 2020-07-10
Supplement: cmh-2020-0005-suppl1.pdf [file cmh-2020-0005-suppl1.pdf]

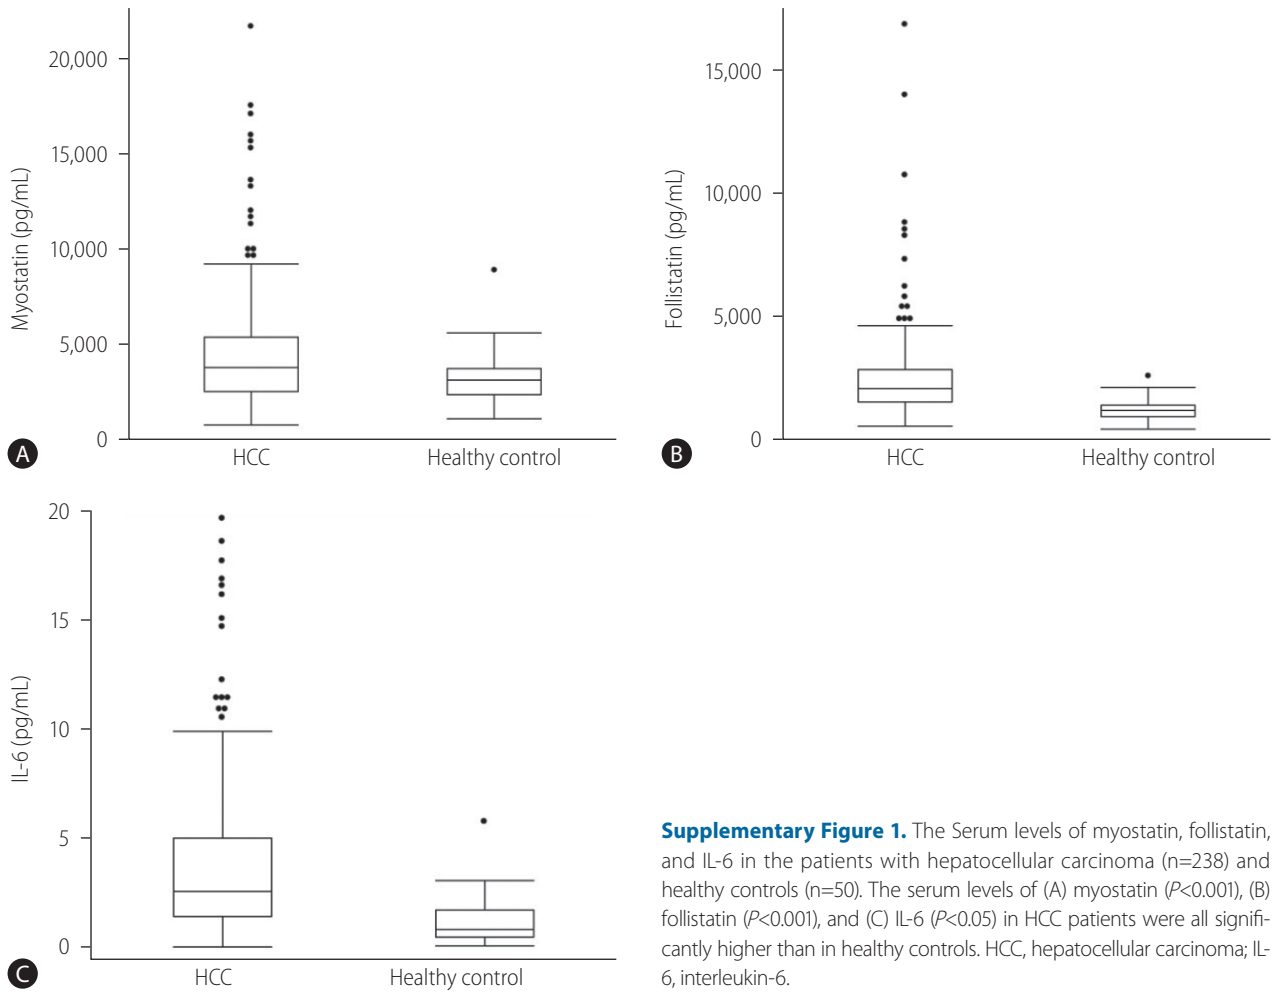

**Supplementary Figure 1.** The Serum levels of myostatin, follistatin, and IL-6 in the patients with hepatocellular carcinoma (n=238) and healthy controls (n=50). The serum levels of (A) myostatin ( $P<0.001$ ), (B) follistatin ( $P<0.001$ ), and (C) IL-6 ( $P<0.05$ ) in HCC patients were all significantly higher than in healthy controls. HCC, hepatocellular carcinoma; IL-6, interleukin-6.
