# Supplementary material for: The association of the serum levels of myostatin, follistatin, and interleukin-6 with sarcopenia, and their impacts on survival in patients with hepatocellular carcinoma
Source: PubMed Central journal article supplement — Clin Mol Hepatol. 2020 Jul 10;26(4):492–505. doi: 10.3350/cmh.2020.0005 (PMC7641544; doi:10.3350/cmh.2020.0005), 2020-07-10
Supplement: cmh-2020-0005-suppl2.pdf [file cmh-2020-0005-suppl2.pdf]

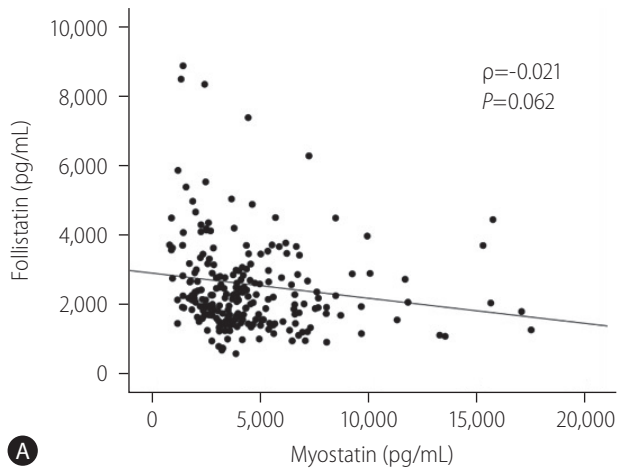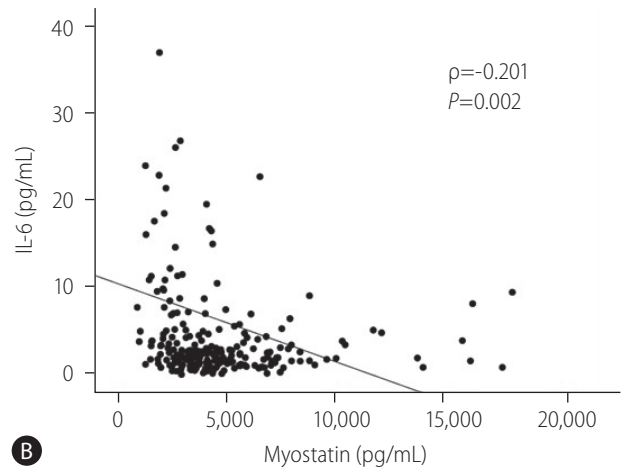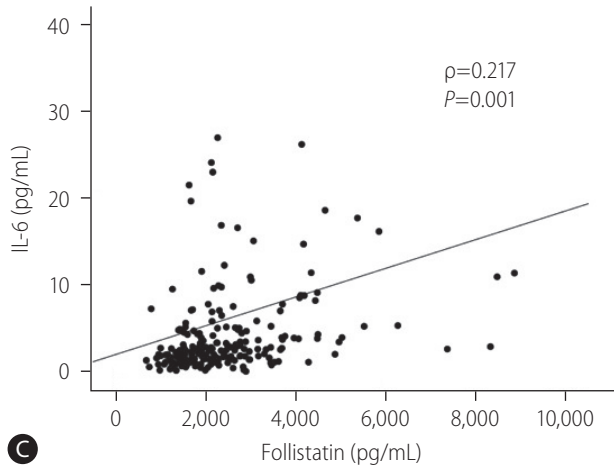

**Supplementary Figure 2.** Relationship between (A) serum myostatin and follistatin levels, (B) serum myostatin and IL-6 levels, (C) serum follistatin and IL-6 levels in the patients with HCC. The serum IL-6 levels showed a negative correlation with the myostatin ( $\rho=-0.288$ ,  $P<0.0001$ ) and a positive correlation with the follistatin level ( $\rho=0.422$ ,  $P<0.0001$ ). The serum myostatin level was negatively correlated with the follistatin level ( $\rho=-0.218$ ,  $P=0.0007$ ). IL-6, interleukin-6; HCC, hepatocellular carcinoma.
