# Supplementary material for: The association of the serum levels of myostatin, follistatin, and interleukin-6 with sarcopenia, and their impacts on survival in patients with hepatocellular carcinoma
Source: PubMed Central journal article supplement — Clin Mol Hepatol. 2020 Jul 10;26(4):492–505. doi: 10.3350/cmh.2020.0005 (PMC7641544; doi:10.3350/cmh.2020.0005), 2020-07-10
Supplement: cmh-2020-0005-suppl3.pdf [file cmh-2020-0005-suppl3.pdf]

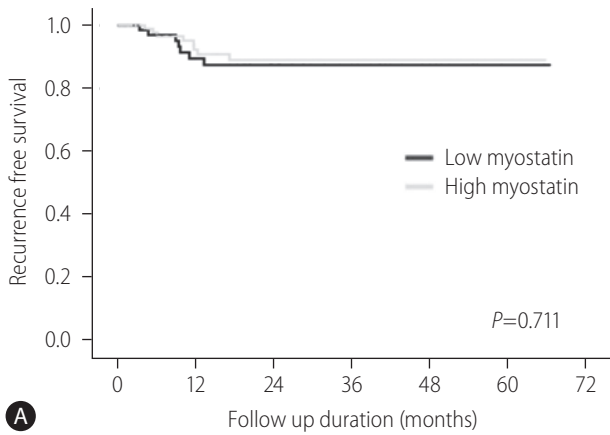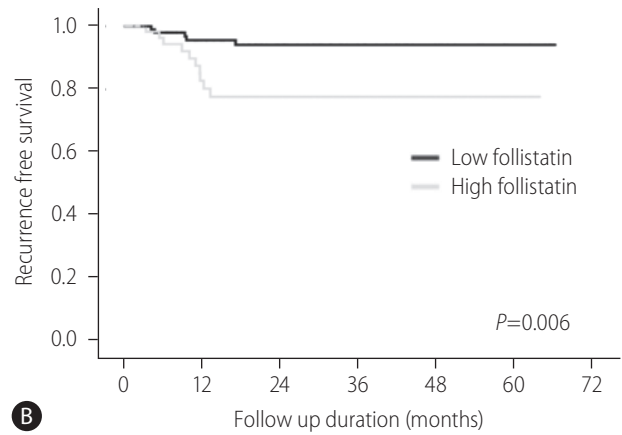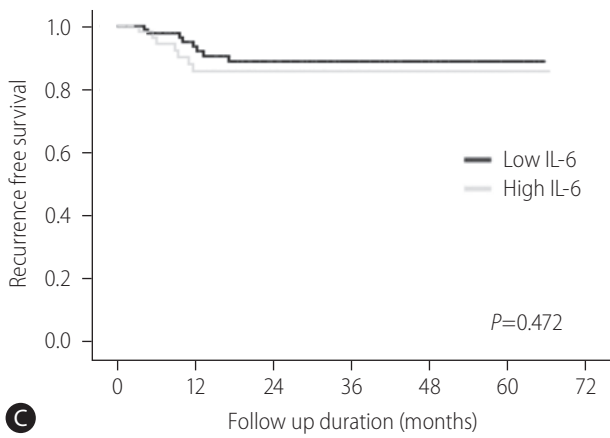

**Supplementary Figure 3.** Recurrence free survival regarding to serum levels of (A) myostatin levels, (B) follistatin levels, and (C) serum IL-6 levels in HCC patients. The high follistatin group showed a significantly poor survival than the low follistatin group, while myostatin and IL-6 levels did not show a significant difference. IL-6, interleukin-6; HCC, hepatocellular carcinoma.
